# Supplementary material for: Photoinduced curcumin derivative-coatings with antibacterial properties
Source: Royal Society of Chemistry journal article supplement (doi:10.1039/c5ra19499g), 2015-01-01

## SUPPORTING INFORMATION

### Photoinduced curcumin derivative-coatings with antibacterial properties

M. Condat, P.-E. Mazeran, J.-P. Malval, J. Lalevée, F. Morlet-Savary, E. Renard, V. Langlois, S. Abbad Andalloussi, D.-L. Versace\*

**Figure S1.** Evolution of the absorbance of 1,3-diphenylisobenzofuran (DBF) and curcumin alone at 480 nm in acetonitrile under visible light illumination

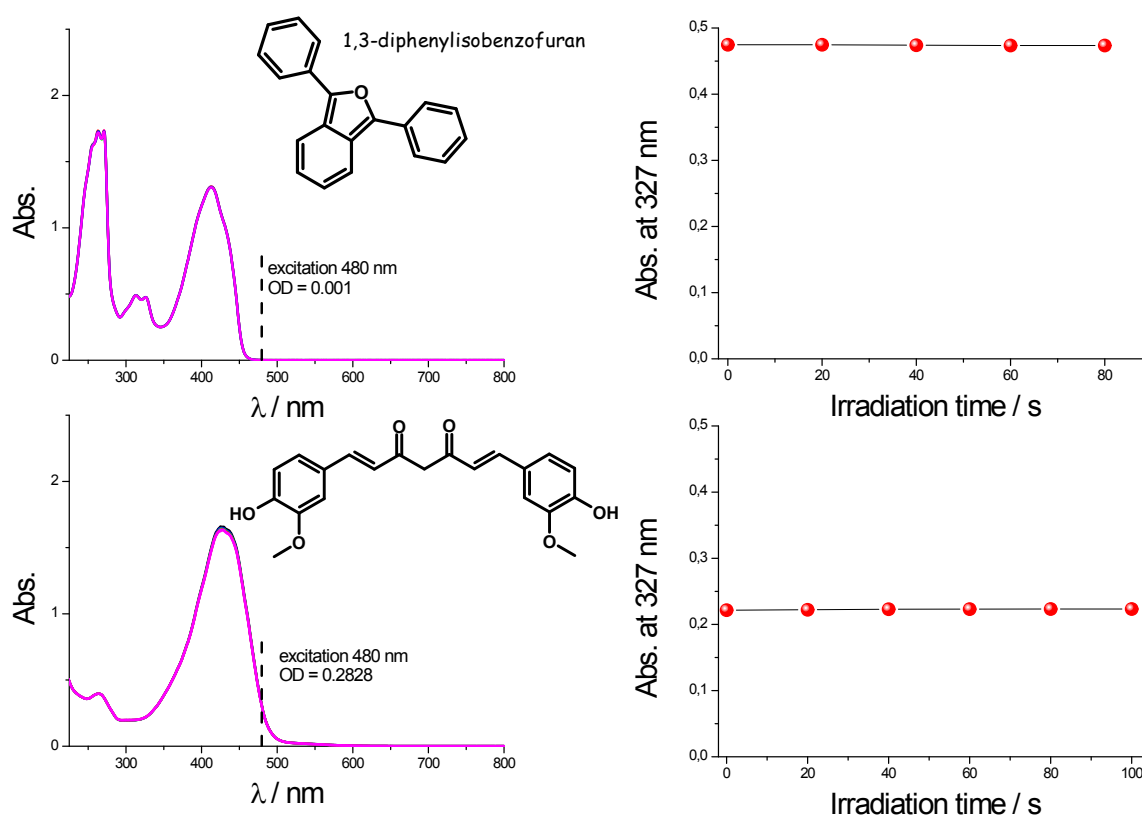

**Figure S2.** Emission spectrum of the lamps used during the different incubation times.

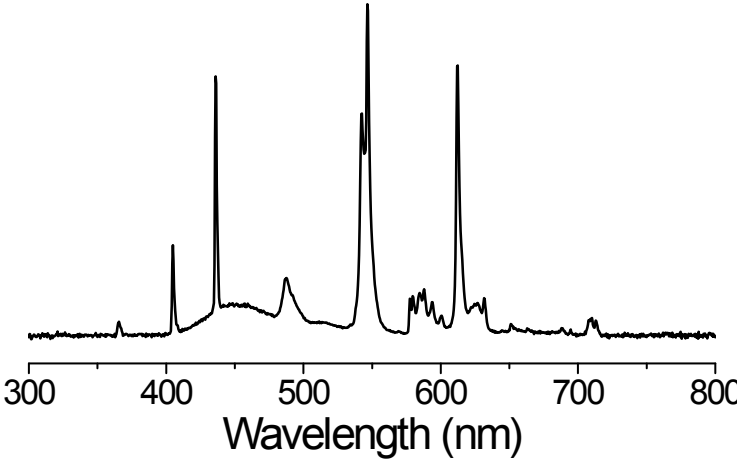

Supplement: c5ra19499g1.pdf [file c5ra19499g1.pdf]
